# Supplementary material for: The Application of High-Resolution Melting Analysis to trnL (UAA) Intron Allowed a Qualitative Identification of Apple Juice Adulterations
Source: MDPI journal article supplement (doi:10.3390/foods12071437), 2023-03-28
Supplement: s1 [file s1]

| COMMON NAME        | SCIENTIFIC NAME              | ACCESSION NUMBER |
|--------------------|------------------------------|------------------|
| Almond             | <i>Prunus dulcis</i>         | NC_034696.1      |
| American cranberry | <i>Vaccinium macrocarpon</i> | NC_019616.1      |
| Apple              | <i>Malus domestica</i>       | MK434916.1       |
| Apricot            | <i>Prunus armeniaca</i>      | NC_043901.1      |
| Avocado            | <i>Persea americana</i>      | NC_031189.1      |
| Barley             | <i>Hordeum vulgare</i>       | NC_008590.1      |
| Beet               | <i>Beta vulgaris</i>         | EF534108.1       |
| Cacao              | <i>Theobroma cacao</i>       | NC_014676.2      |
| Carrot             | <i>Daucus carota</i>         | NC_008325.1      |
| Common bean        | <i>Phaseolus vulgaris</i>    | NC_009259.1      |
| Courgette          | <i>Cucurbita pepo</i>        | NC_038229.1      |
| Cucumber           | <i>Cucumis sativus</i>       | NC_007144.1      |
| Eggplant           | <i>Solanum melongena</i>     | NC_030207.1      |
| Garden pea         | <i>Pisum sativum</i>         | NC_014057.1      |
| Grape              | <i>Vitis vinifera</i>        | NC_007957.1      |
| Johnson grass      | <i>Sorghum halepense</i>     | MG709461.1       |
| Kiwi               | <i>Actinidia chinensis</i>   | NC_026690.1      |
| Lemon              | <i>Citrus limon</i>          | NC_034690.1      |
| Lettuce            | <i>Lactuca sativa</i>        | AP007232.1       |
| Maize              | <i>Zea mays</i>              | NC_001666.2      |
| Mango              | <i>Mangifera indica</i>      | NC_035239.1      |
| Millet             | <i>Panicum miliaceum</i>     | NC_029732.1      |
| Olive              | <i>Olea europaea</i>         | NC_013707.2      |
| Orange             | <i>Citrus sinensis</i>       | NC_008334.1      |
| Peach              | <i>Prunus persica</i>        | NC_014697        |
| Pear               | <i>Pyrus communis</i>        | NC_045336.1      |
| Pineapple          | <i>Ananas comosus</i>        | NC_026220.1      |
| Potato             | <i>Solanum tuberosum</i>     | NC_008096.2      |
| Radish             | <i>Raphanus sativus</i>      | NC_024469.1      |
| Rice               | <i>Oryza sativa</i>          | NC_031333.1      |
| Rye                | <i>Secale cereale</i>        | NC_021761.1      |
| Sesame             | <i>Sesamum indicum</i>       | NC_016433.2      |
| Spinach            | <i>Spinacia oleracea</i>     | NC_002202.1      |
| Strawberry         | <i>Fragaria vesca</i>        | NC_015206.1      |
| Sugarcane          | <i>Saccharum officinarum</i> | NC_035224.1      |
| Sunflower          | <i>Helianthus annuus</i>     | NC_007977.1      |
| Tomato             | <i>Solanum lycopersicum</i>  | NC_007898.3      |
| Walnut             | <i>Juglans regia</i>         | KT963008.1       |
| Wheat              | <i>Triticum aestivum</i>     | NC_002762.1      |
|                    | <i>Triticum turgidum</i>     | NC_024814.1      |
| Wild cabbage       | <i>Brassica oleracea</i>     | NC_041167.1      |
| Wild oat           | <i>Avena sativa</i>          | NC_027468.1      |

**Supplementary Table S1.** List of common names, scientific name and accession numbers of the plant species used for the phylogenetic analysis.

| Name           | P6 loop sequence                                                                                   |
|----------------|----------------------------------------------------------------------------------------------------|
| Apple database | GGGCAATCCTGAGCCAAATCCTGTTTTATGAAAATAAACAAGGGT                                                      |
| Pear database  | GGGCAATCCTGAGCCAAATCCTGTTTTATGAAAATAAACAAGGGT                                                      |
| Peach database | GGGCGATCCTGAGCCAAATCCTGTTTTATTAAACAAACAAGGGT                                                       |
| Kiwi database  | GGGCAATCCTGAGCCAAATCCTTTTTTTCGAAAACAAACAAAGAT<br>* * * * * * * * * * * * * * * * * * * * * * * *   |
| Apple database | TTCATAAACCGAAAATAAAA-AAGGATAGGTGCAGAGACTCAATGG                                                     |
| Pear database  | TTCATAAACCGAAAATAAAA-AAGGATAGGTGCAGAGACTCAATGG                                                     |
| Peach database | TTCATAAACCGAGAATAAAA-AAGGATAGGTGCAGAGACTCAATGG                                                     |
| Kiwi database  | T-CAGAAAGCGAAAATAAAAACAAGGATAGGTGCAGAGACTCAATGG<br>* * * * * * * * * * * * * * * * * * * * * * * * |

**Supplementary Table S2.** ClustalW alignment of P6 loop sequences of apple, pear, peach and kiwi present in GenBank.

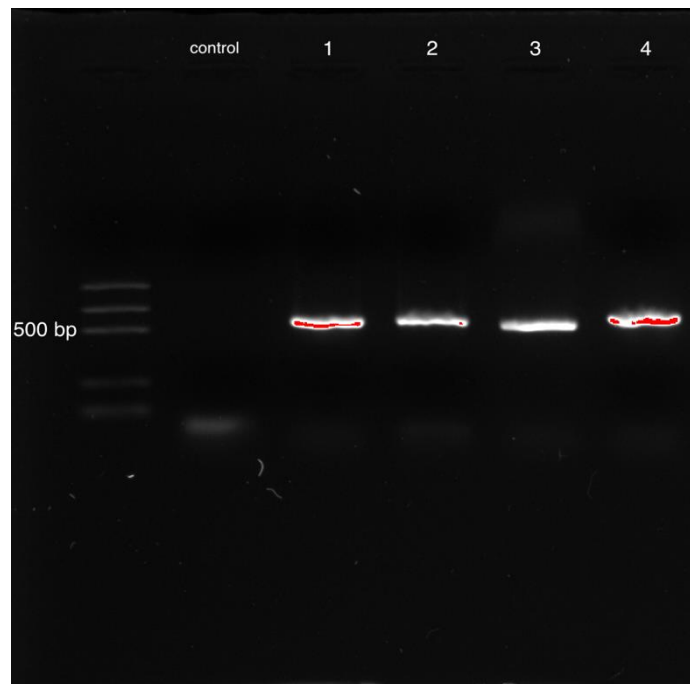

**Supplementary Figure 1A.**

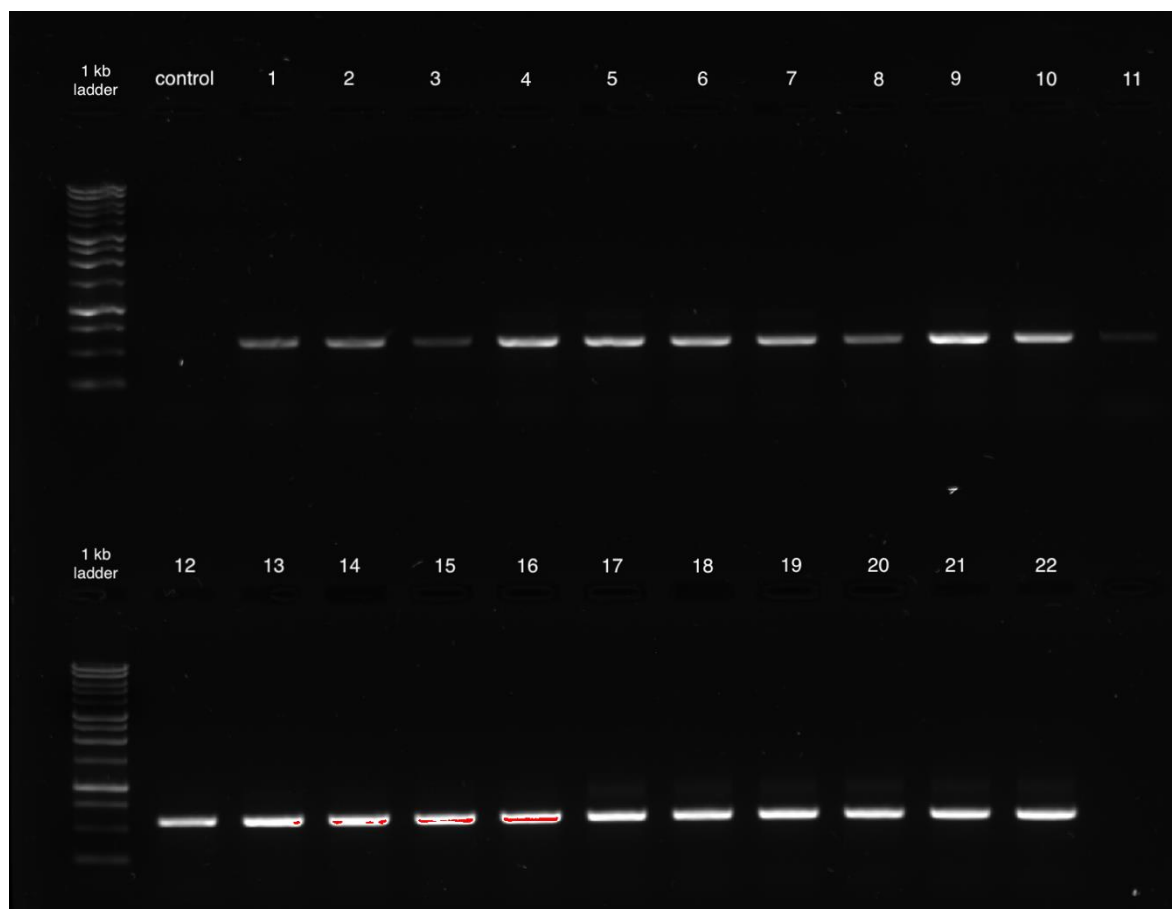

**Supplementary Figure 1B.**

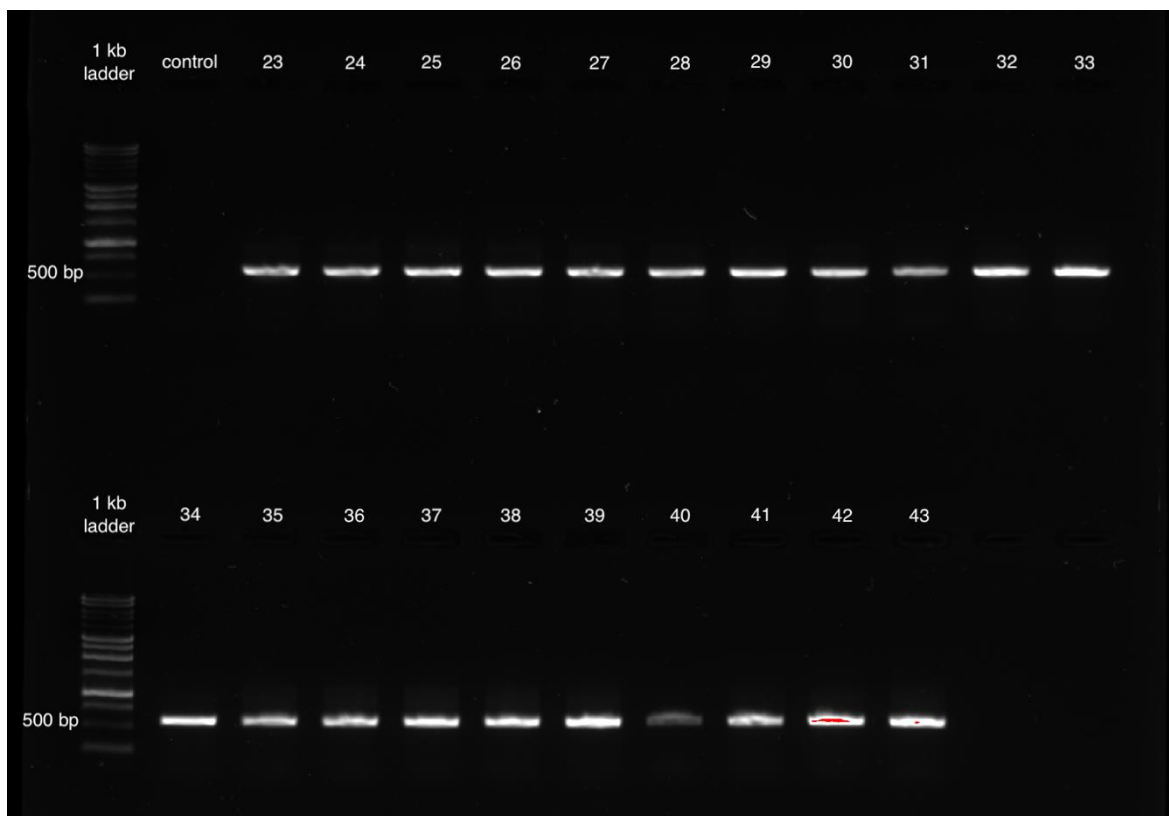

**Supplementary Figure 1C.**

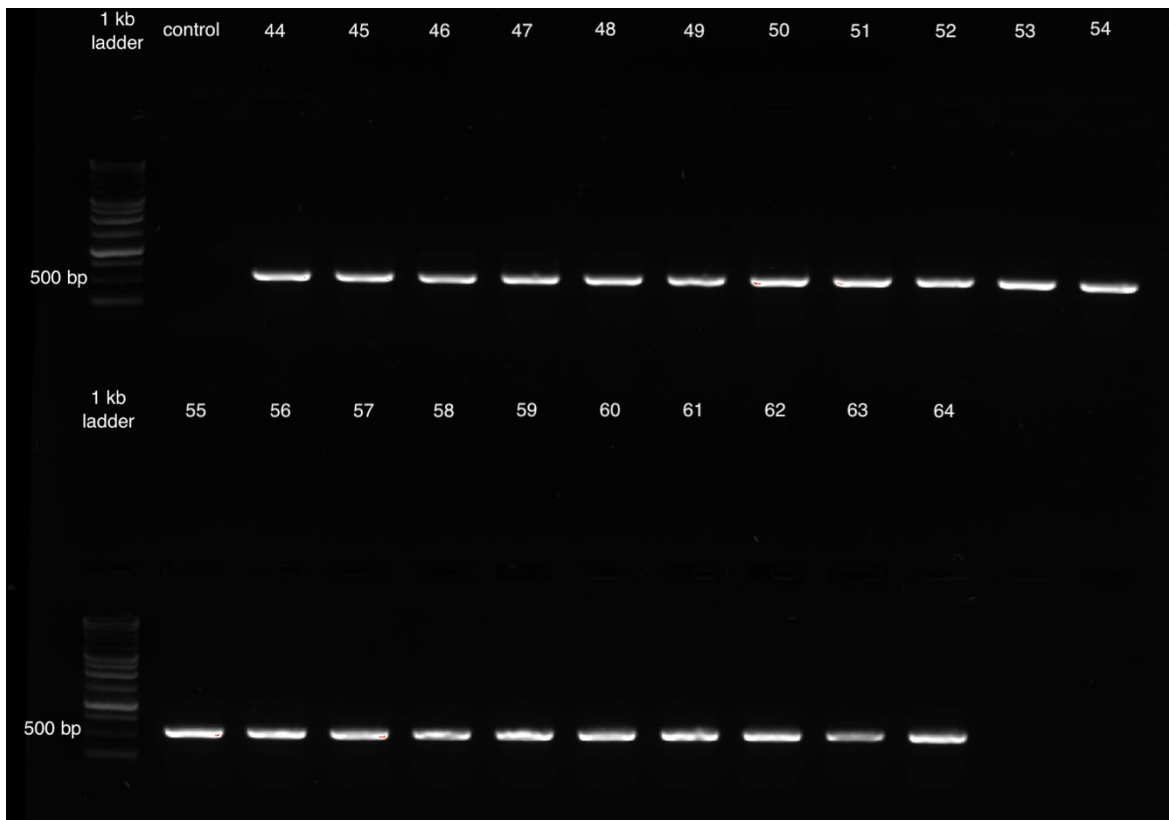

**Supplementary Figure 1D.**

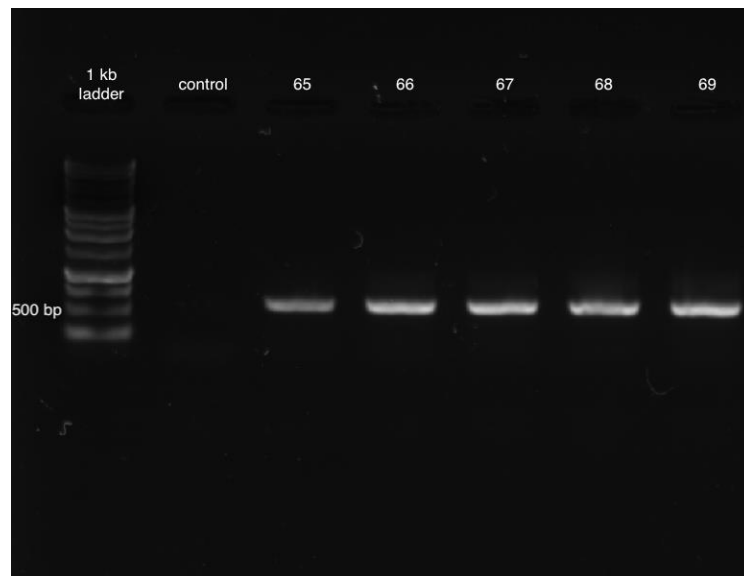

**Supplementary Figure 1E.**

**Supplementary Figure S1.** Electrophoresis gel of amplified *trnL*(UAA) intron of pure fruits and homemade mixed juice extracted in triplicate

**1A)** Peach fruit (1), Pear fruit (2), Kiwi fruit (3) and Apple fruit (4).

**1B)** Apple/Pear juice: (1-3) 99.5%/0.5%; (4-6) 99%/1%; (7-9) 95%/5%; (10-12) 90%/10%; (13-15) 75%/25%; (16-18) 50%/50%. Apple/peach juice: (19-21) 99.5%/0.5%; (22) 99%/1%.

**1C)** Apple/peach juice: (23,24) 99%/1%; (25-27) 95%/5%; (28-30) 90%/10%; (31-33) 75%/25%; (34-36) 50%/50%. Apple/Kiwi juice: (37-39) 99.5%/0.5%; (40-42) 99%/1%; (43) 95%/5%.

**1D)** Apple/Kiwi juice: (44,45) 95%/5%; (46-48) 90%/10%; (49-51) 75%/25%; (52-54) 50%/50%; (55-57) 25%/75%; (58-60) 10%/90%; (61-63) 5%/95%; (64) 1%/99%.

**1E)** Apple/Kiwi juice: (65,66) 1%/99%; (67-69) 0.5%/99.5%.

| Name                              | <i>trnL</i> (UAA) sequence                                                                                                            |
|-----------------------------------|---------------------------------------------------------------------------------------------------------------------------------------|
| Apple sequenced<br>Apple database | CGAAATCGGTAGACGCTACGGACTTAATTGGATTGAGCCTTGGTATGGAAACCTACCAAG<br>CGAAATTGGTAGACGCTACGGACTTAATTGGATTGAGCCTTGGTATGGAAACCTACCAAG<br>***** |
| Apple sequenced<br>Apple database | TGAGAACTTTCAAATTCAGAGAAACCCTGGAATTAAAAATGGGCAATCCTGAGCCAAATC<br>TGAGAACTTTCAAATTCAGAGAAACCCTGGAATTAAAAATGGGCAATCCTGAGCCAAATC<br>***** |
| Apple sequenced<br>Apple database | CTGTTTTATGAAAATAAACAAGGGTTTCATAAACCGAAAATAAAAAAGGATAGGTGCAGA<br>CTGTTTTATGAAAATAAACAAGGGTTTCATAAACCGAAAATAAAAAAGGATAGGTGCAGA<br>***** |
| Apple sequenced<br>Apple database | GACTCAATGGAAGCTGTTCTAACAATGGAGTTGGCTGCATTGTGTTAGTAAAGGAATCC<br>GACTCAATGGAAGCTGTTCTAACAATGGAGTTGGCTGCATTGTGTTAGTAAAGGAATCC<br>*****   |
| Apple sequenced<br>Apple database | TTCCATCGAACTTCAGAAAGGATGAAGGATAAACCTATATACATACGTATAGTACTGAA<br>TTCCATCGAACTTCAGAAAGGATGAAGGATAAACCTATATACATACGTATAGTACTGAA<br>*****   |
| Apple sequenced<br>Apple database | ATACTATCTCAAATGATTAATGACGACCCAAATCTGTATTTTTTTATATTTATATGAAA<br>ATACTATCTCAAATGATTAATGACGACCCAAATCTGTATTTTTTTATATTTATATGAAA<br>*****   |
| Apple sequenced<br>Apple database | AATGAAAGACTTGTGTGAATCGATTAAAAATTGAAAAAGAATCGAATATTTATTGATC<br>AATGAAAGACTTGTGTGAATCGATTAAAAATTGAAAAAGAATCGAATATTTATTGATC<br>*****     |
| Apple sequenced<br>Apple database | AAACCATTCACTCCACCGTAGTCTGATAGATCTTTTAAATAATTGATTAATCGGACGAGA<br>AAACCATTCACTCCACCGTAGTCTGATAGATCTTTTAAATAATTGATTAATCGGACGAGA<br>***** |
| Apple sequenced<br>Apple database | ATAAAGATAGAGTCCATTATACATGTTAATATCGACAACAATGAAATTTATAGTAAGAG<br>ATAAAGATAGAGTCCATTATACATGTTAATATCGACAACAATGAAATTTATAGTAAGAG<br>*****   |
| Apple sequenced<br>Apple database | GAAAATCCGTCGACTTTAGAAATCGTGAGGGTTCAAGTCCCTCTATCCCC<br>GAAAATCCGTCGACTTTAGAAATCGTGAGGGTTCAAGTCCCTCTATCCCC<br>*****                     |

**Supplementary Table 3A.**

| Name           | <i>trnL</i> (UAA) sequence                                              |
|----------------|-------------------------------------------------------------------------|
| Pear sequenced | CGAAATCGGTAGACGCTACGGACTTAATTGGATTGAGCCTTGGTATGGAAACCTACCAAG            |
| Pear database  | CGAAATTGGTAGACGCTACGGACTTAATTGGATTGAGCCTTGGTATGGAAACCTACCAAG<br>*****   |
| Pear sequenced | TGAGAACTTTCAAATTCAGAGAAACCCCTGGAATTAAAAATGGGCAATCCTGAGCCAAATC           |
| Pear database  | TGAGAACTTTCAAATTCAGAGAAACCCCTGGAATTAAAAATGGGCAATCCTGAGCCAAATC<br>*****  |
| Pear sequenced | CTGTTTTATGAAAAAAACAAGGGTTTCATAAACCGAAAAATAAAAAAGGATAGGTGCAGA            |
| Pear database  | CTGTTTTATGAAAAATAACAAGGGTTTCATAAACCGAAAAATAAAAAAGGATAGGTGCAGA<br>*****  |
| Pear sequenced | GACTCAATGGAAGCTGTTCTAACAAATGGAGTTGGCTGCATTGTGTTAGTAAAGGAATCC            |
| Pear database  | GACTCAATGGAAGCTGTTCTAACAAATGGAGTTGGCTGCATTGTGTTAGTAAAGGAATCC<br>*****   |
| Pear sequenced | TTCCATCGAAACTTCAGAAAGGATGAAGGATAAACCTATATACATACGTATAGTACTGAA            |
| Pear database  | TTCCATCGAAACTTCAGAAAGGATGAAGGATAAACCTATATACATACGTATAGTACTGAA<br>*****   |
| Pear sequenced | ATACTATCTCAAAATGATTAATGACGACCCAAATCTTCTTTTTTTTATTTATATGAA               |
| Pear database  | ATACTATCTCAAAATGATTAATGACGACCCAAATCTTCTTTTGTAT-ATTTATATGAA<br>***** * * |
| Pear sequenced | AAATGAAAGACTTGTTGTGAATCGATTAAAAATTGAAAAAGAATCGAATATTCATTGAT             |
| Pear database  | AAATGAAAGACTTGTTGTGAATCGATTAAAAATTGAAAAAGAATCGAATATTCATTGAT<br>*****    |
| Pear sequenced | CAAACCATTCACTCCACCGTAGTCTGATAGATCTTTTAAATAATTGATTAATCGGACGAG            |
| Pear database  | CAAACCATTCACTCCACCGTAGTCTGATAGATCTTTTAAATAATTGATTAATCGGACGAG<br>*****   |
| Pear sequenced | AATAAGATAGAGTCCCATTTATACATGTTAATATCGACAACAATGAAATTTATAGTAAGA            |
| Pear database  | AATAAGATAGAGTCCCATTTATACATGTTAATATCGACAACAATGAAATTTATAGTAAGA<br>*****   |
| Pear sequenced | GGAAAATCCGTCGACT--AGAATNNNN-----                                        |
| Pear database  | GGAAAATCCGTCGACTTTAGAAATCGTGAGGGTTCAAGTCCCTCTATCCCC<br>*****            |

**Supplementary Table 3B.**

| Name            | <i>trnL</i> (UAA) sequence                                             |
|-----------------|------------------------------------------------------------------------|
| Peach sequenced | CGAAATTGGTAGACGCTACGGACTTAATTGGATTGAGCCTTGGTATGGAAACCTACCAAG           |
| Peach database  | CGAAATCGGTAGACGCTACGGACTTAATTGGATTGAGCCTTGGTATGGAAACCTACCAAG<br>*****  |
| Peach sequenced | TGAGAACTTTCAAATTCAGAGAAACCCTGGAATTAAAAATGGGCGATCCTGAGCCAAATC           |
| Peach database  | TGAGAACTTTCAAATTCAGAGAAACCCTGGAATTAAAAATGGGCGATCCTGAGCCAAATC<br>*****  |
| Peach sequenced | CTGTTTTATTAAAACAAACAAGGGTTTCATAAACCGAGAATAAAAAAGGATAGGTGCAGA           |
| Peach database  | CTGTTTTATTAAAACAAACAAGGGTTTCATAAACCGAGAATAAAAAAGGATAGGTGCAGA<br>*****  |
| Peach sequenced | GACTCAATGGAAGCTGTTCTAACAAATGGAGTTGGCTGCATTGTGTTAGTAAAGGAATCC           |
| Peach database  | GACTCAATGGAAGCTGTTCTAACAAATGGAGTTGGCTGCATTGTGTTAGTAAAGGAATCC<br>*****  |
| Peach sequenced | TTACATCGAAACTTCCGAAAGGATGAAGGATAAACCTATATGCATACGTATAGTACTGCA           |
| Peach database  | TTACATCGAAACTTCCGAAAGGATGAAGGATAAACCTATATGCATACGTATAGTACTGCA<br>*****  |
| Peach sequenced | ATAGTATCTCCAAATGATTAATGACGGCTCGAATCTGTATTTTTTTATATTTATATGAAA           |
| Peach database  | ATAGTATCTCCAAATGATTAATGACGGCTCGAATCTGTATTTTTTTATATTTATATGAAA<br>*****  |
| Peach sequenced | AACGAAAGAATTGTTGTGAATCAATTAAAAATTGAAAAAGAATCGAATATTCATTGATC            |
| Peach database  | AACGAAAGAATTGTTGTGAATCAATTAAAAATTGAAAAAGAATCGAATATTCATTGATC<br>*****   |
| Peach sequenced | AAATCATTCACCTCCATCATAGTCTGATAGATCTTTTAAAGAATTGATTAATCGGACGAGA          |
| Peach database  | AAATCATTCACCTCCATCATAGTCTGATAGATCTTTTAAAGAATTGATTAATCGGACGAGA<br>***** |
| Peach sequenced | ATAAAGATAGAGTCCATTATACATGTCAATATCGACAACAATGAAATTTATAGTAAGAG            |
| Peach database  | ATAAAGATAGAGTCCATTATACATGTCAATATCGACAACAATGAAATTTATAGTAAGAG<br>*****   |
| Peach sequenced | GAAAATCCGTCGACTTTAGAAATCGTGAGGGTTCAAGTCCCTCTATCCCC                     |
| Peach database  | GAAAATCCGTCGACTTTAGAAATCGTGAGGGTTCAAGTCCCTCTATCCCC<br>*****            |

**Supplementary Table 3C.**



| Name           | <i>trnL</i> (UAA) sequence                                              |
|----------------|-------------------------------------------------------------------------|
| Kiwi sequenced | CGAAATCGGTAGGCGCTACGGACTTAATTGGATTGAGCCTTGGTATGGAAACCTACTAAG            |
| Kiwi database  | CGAAATTGGTAGACGCTACGGACTTAATTGGATTGAGCCTTGGTATGGAAACCTACTAAG<br>*****   |
| Kiwi sequenced | TGATAACTTTCAAATTCAGAGAAACCCTGGAATTAATAAAAAATGGGCAATCCTGAGCCAA           |
| Kiwi database  | TGATAACTTTCAAATTCAGAGAAACCCTGGAATTAATAAAAAATGGGCAATCCTGAGCCAA<br>*****  |
| Kiwi sequenced | ATCCTTTTTTTTCGAAAACAAACAAAGATTCAGAAAGCGAAAAATAAAACAAGGATAGGTGC          |
| Kiwi database  | ATCCTTTTTTTTCGAAAACAAACAAAGATTCAGAAAGCGAAAAATAAAACAAGGATAGGTGC<br>***** |
| Kiwi sequenced | AGAGACTCAATGGAAGCTGTTCTAACAAATGGGGTTAACTGCGTTGGTAGAGGAATCCTT            |
| Kiwi database  | AGAGACTCAATGGAAGCTGTTCTAACAAATGGGGTTAACTGCGTTGGTAGAGGAATCCTT<br>*****   |
| Kiwi sequenced | CCATCGAACTTCAGAAAGGATGAAAGAGAAACCTATATACATACGCATACGTACTGAAA             |
| Kiwi database  | CCATCGAACTTCAGAAAGGATGAAAGAGAAACCTATATACATACGCATACGTACTGAAA<br>*****    |
| Kiwi sequenced | TACTTAATCAAATGATTAATGACGGGGTATCCGTATTTTTTTTATGAAAAATGGACGAAT            |
| Kiwi database  | TACTTAATCAAATGATTAATGACGGGGTATCCGTATTTTTTTTATGAAAAATGGACGAAT<br>*****   |
| Kiwi sequenced | TGTTGTGAATCGATTCCCCATTGAATAAAGAATTGAATATTTATTTATTGATCAAATCAT            |
| Kiwi database  | TGTTGTGAATCGATTCCCCATTGAATAAAGAATTGAATATTTATTTATTGATCAAATCAT<br>*****   |
| Kiwi sequenced | TTACTCCATAGTCTGATAGATCTTTTTAAGAACTGATTAATCGGACAAGAATAAAGATAG            |
| Kiwi database  | TTACTCCATAGTCTGATAGATCTTTTTAAGAACTGATTAATCGGACAAGAATAAAGATAG<br>*****   |
| Kiwi sequenced | AGTCCCATTCTACATGTCAATACCGACAACAATGAAATTGATAGTACGAGGAAAATCCGT            |
| Kiwi database  | AGTCCCATTCTACATGTCAATACCGACAACAATGAAATTGATAGTACGAGGAAAATCCGT<br>*****   |
| Kiwi sequenced | CGACTTTAGAAATCGTGAGGGTTCAGGCCCTCTATCCCC                                 |
| Kiwi database  | CGACTTTAGAAATCGTGAGGGTTCAGGCCCTCTATCCCC<br>*****                        |

**Supplementary Table 3D.**

**Supplementary Table S3.** ClustalW alignment of *trnL*(UAA) intron fragments

**3A)** Apple sequenced fragment aligned with apple *trnL*(UAA) intron present in GenBank

**3B)** Pear sequenced fragment aligned with pear *trnL*(UAA) intron present in GenBank

**3C)** Peach sequenced fragment aligned with peach *trnL*(UAA) intron present in GenBank

**3D)** Kiwi sequenced fragment aligned with kiwi *trnL*(UAA) intron present in GenBank

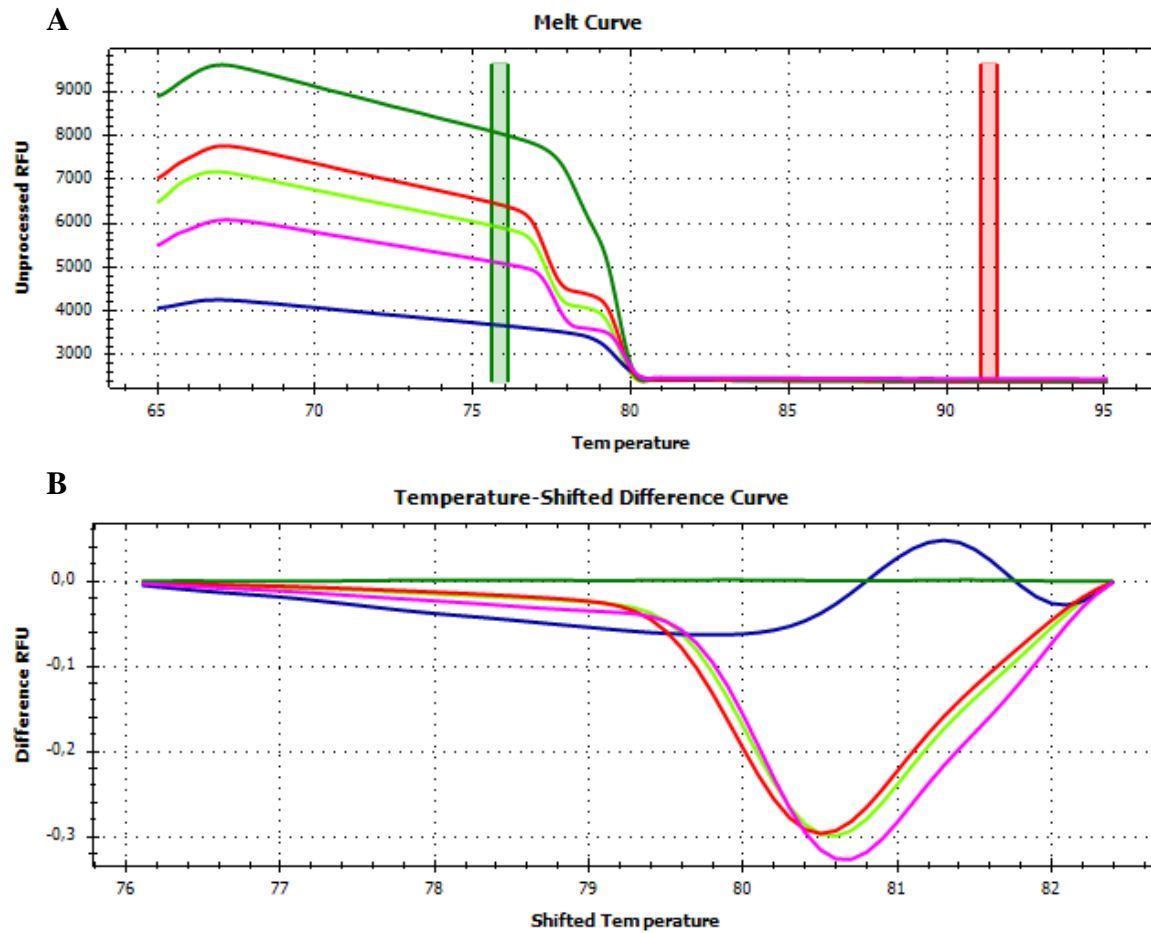

**Supplementary Figure S2.** Melt curves (A) and temperature-shifted Difference curves (B) of HRMA of *trnL*(UAA) intron on apple and pear mixed juices. Apple fruit: red, pear fruit: pink, apple/pear juices 99.5%/0.5%: blue and 50%/50%: light green. The reference cluster is kiwi fruit: green. The HRMA has been carried out on three independent replicates of each sample and the most representative curve of each sample is reported in the graph.

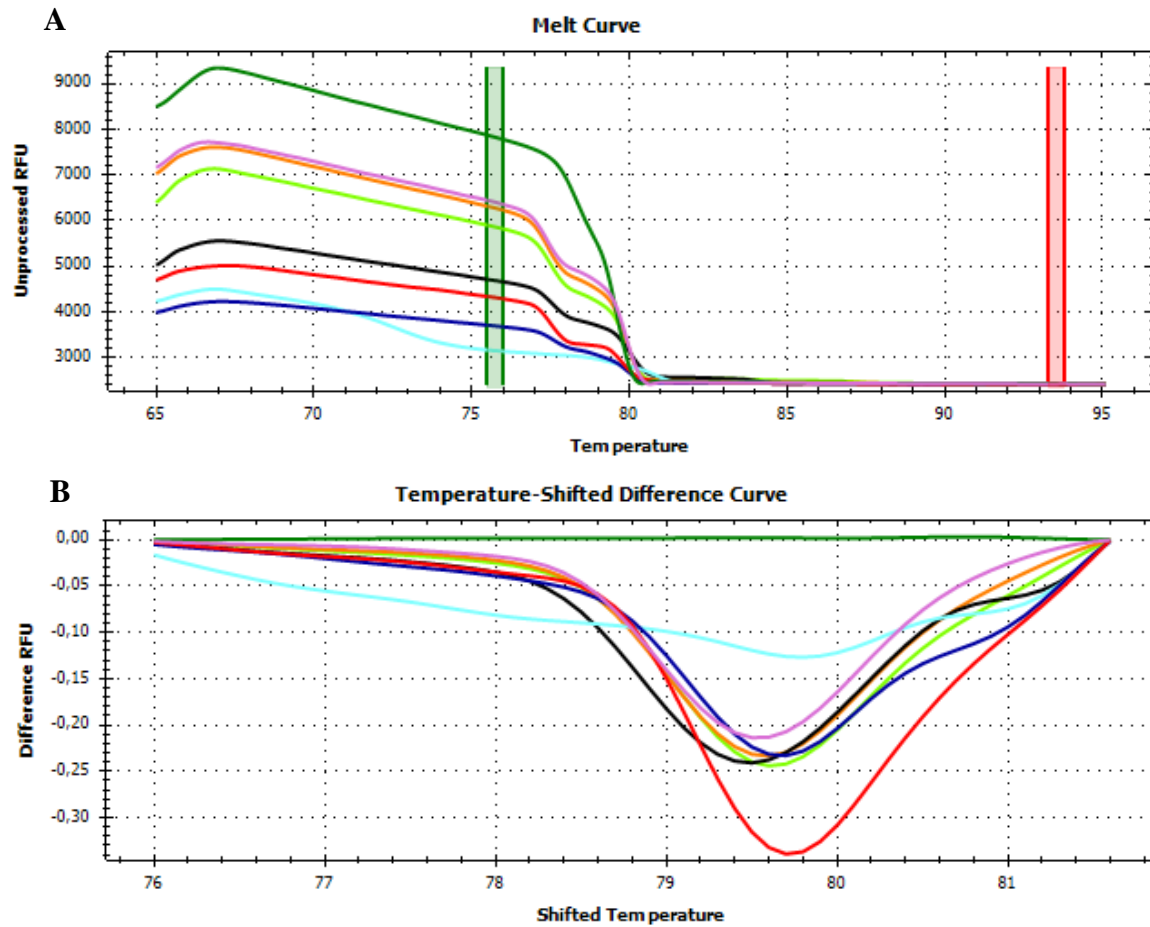

**Supplementary Figure S3.** Melt curves (A) and temperature-shifted Difference curves (B) of HRMA of *trnL*(UAA) intron on apple and peach mixed juices. Apple fruit: red, peach fruit: pink, apple/peach juices 99.5%/0.5%: blue, 95%/5%: light blue, 90%/10%: black, 75%/25%: orange and 50%/50%: light green. The reference cluster is kiwi fruit: green. The HRMA has been carried out on three independent replicates of each sample and the most representative curve of each sample is reported in the graph.

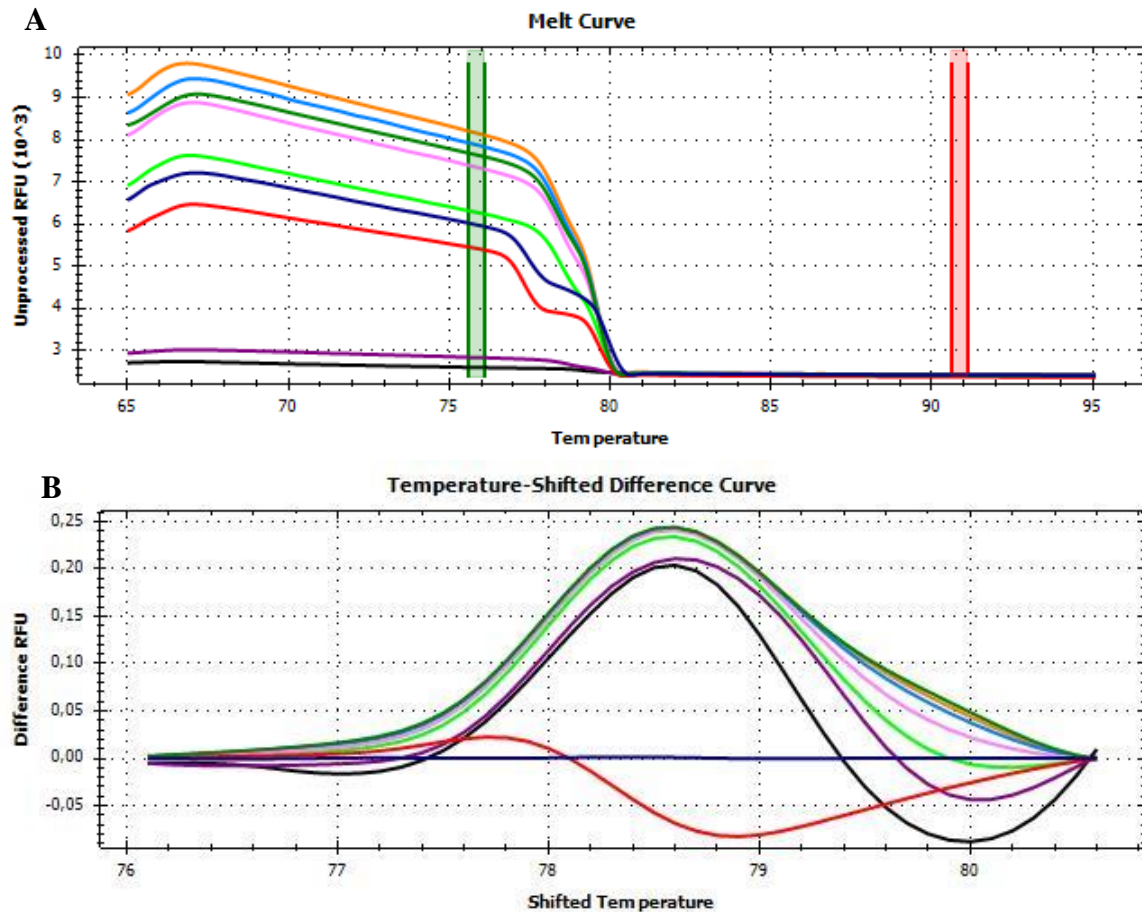

**Supplementary Figure S4.** Melt curves (A) and Temperature-shifted Difference curves (B) of HRMA of *trnL*(UAA) intron on apple and kiwi mixed juices. Apple fruit: red, kiwi fruit: green, apple/kiwi juices 99.5%/0.5%: purple, 99%/1%: black, 95%/5%: pink, 90%/10%: light green, 75%/25%: light blue and 50%/50%: orange. The reference cluster is peach fruit: blue. The HRMA has been carried out on three independent replicates of each sample and the most representative curve of each sample is reported in the graph.
